# Supplementary material for: Designed construction of yolk–shell structured trimanganese tetraoxide nanospheres via polar solvent-assisted etching and biomass-derived activated porous carbon materials for high-performance asymmetric supercapacitors
Source: Royal Society of Chemistry journal article supplement (doi:10.1039/c7ta04314g), 2017-01-01
Supplement: c7ta04314g1.pdf [file c7ta04314g1.pdf]

## Supporting Information

**Designed construction of yolk-shell structured trimanganese tetraoxide nanospheres via polar solvent-assisted etching and biomass-derived activated porous carbon materials for high-performance asymmetric supercapacitors**

*Goli Nagaraju,<sup>a</sup> S. Chandra Sekhar,<sup>a</sup> G. Seeta Rama Raju,<sup>b</sup> L. Krishna Bharat,<sup>a</sup> and Jae Su Yu<sup>a\*</sup>*

<sup>a</sup>Department of Electronics and Radio Engineering, Institute for Wearable Convergence Electronics, Kyung Hee University, 1 Seocheon-dong, Giheung-gu, Yongin-si, Gyeonggi-do 446-701, Republic of Korea.

<sup>b</sup>Department of Energy and Materials Engineering, Dongguk University-Seoul, Seoul 04620, Republic of Korea.

\*Address correspondence to [jsyu@khu.ac.kr](mailto:jsyu@khu.ac.kr)

Tel: +82-31-201-3820; Fax: +82-31-206-2820

**Table S1.** Crystallographic and atomic parameters of the yolk-shell structured Mn<sub>3</sub>O<sub>4</sub> NSs from Rietveld refinement.

| <b>Atom</b>               | <b>Site</b> | <b>x</b> | <b>y</b>         | <b>z</b> | <b>Occ</b> |
|---------------------------|-------------|----------|------------------|----------|------------|
| O                         | 16h         | 0.0      | 0.52507          | 0.23844  | 0.48247    |
| Mn <sup>2+</sup>          | 4a          | 0.0      | 0.0              | 0.0      | 0.24901    |
| Mn <sup>3+</sup>          | 8d          | 0.0      | 0.25             | 0.375    | 0.12538    |
| <b>Lattice Parameters</b> |             |          | <b>R-Factors</b> |          |            |
| a (Å)                     | 5.7635      |          | R <sub>wp</sub>  |          | 2.69       |
| b (Å)                     | 5.7635      |          | R <sub>p</sub>   |          | 3.39       |
| c (Å)                     | 9.4503      |          | R <sub>exp</sub> |          | 4.09       |
| V (Å <sup>3</sup> )       | 313.9195    |          | χ <sup>2</sup>   |          | 0.686      |

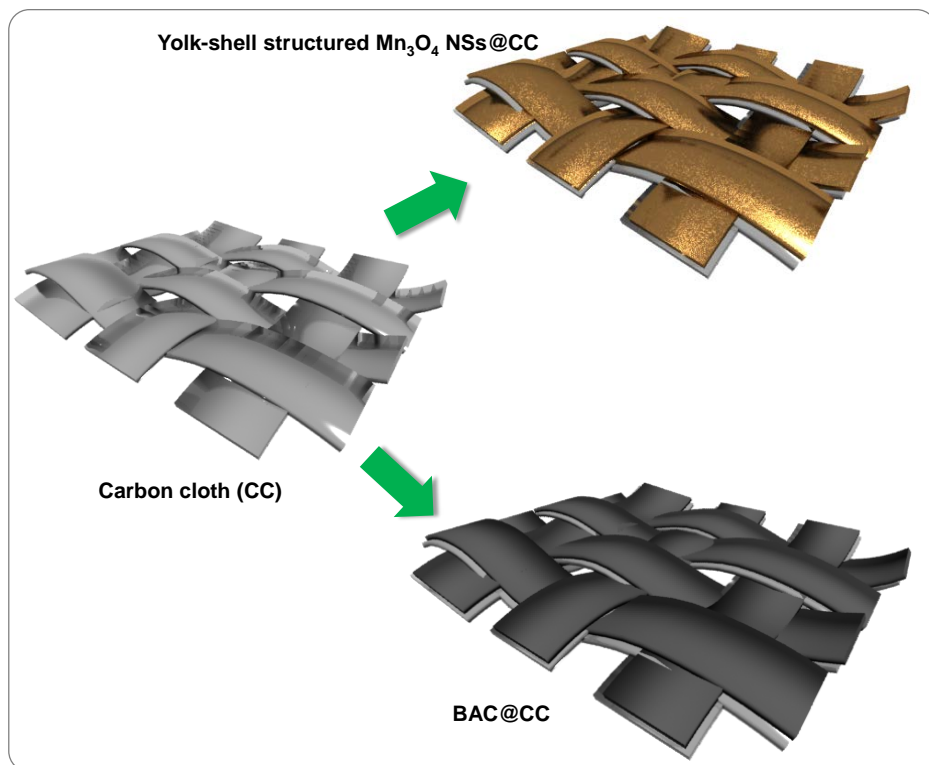

**Figure S1.** Schematic diagram for the coating process of both positive and negative electrode materials for electrochemical tests.

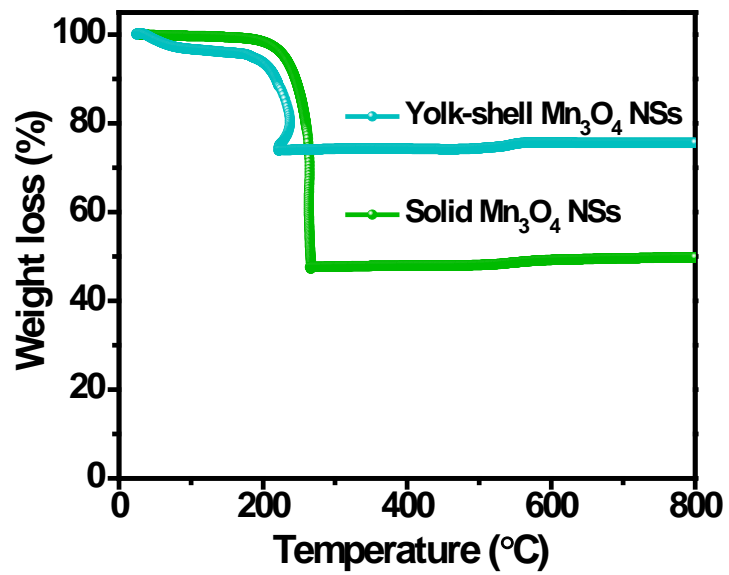

**Figure S2.** TGA analysis of the solid and yolk-shell structured Mn<sub>3</sub>O<sub>4</sub> NSs.

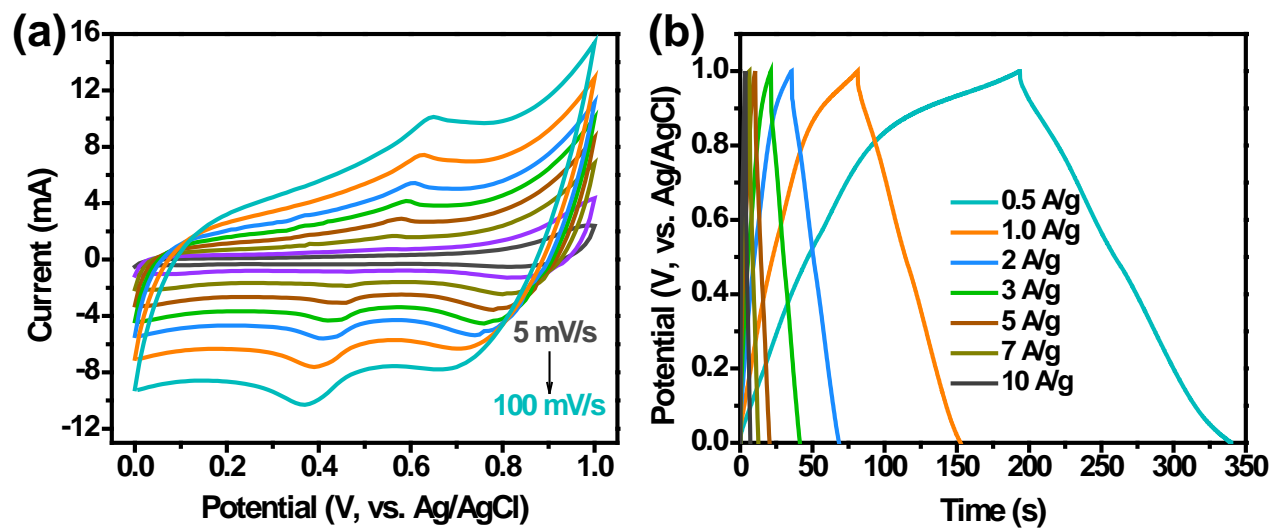

**Figure S3.** (a) CV curves and (GCD) curves of solid  $\text{Mn}_3\text{O}_4$  NSs electrode measured at different scan rates and current densities in 1 M  $\text{Na}_2\text{SO}_4$  electrolyte using the three-electrode system.

The surface analysis of the BAC powder was carried out using BET  $N_2$  adsorption/desorption isotherms. As shown in Figure S4,  $N_2$  adsorption/desorption isotherm of BAC displays a typical type-IV isotherm (based on the IUPAC classification) with a mesoporous property. Specifically, a sharp rise at low relative pressure ( $P/P_0$ ) demonstrates that the BAC made up of large quantities of micropores. Also, the following slope values at 0.43 to 1.0 further shows the macroporous and well-developed mesoporous structures in the BAC powder. The obtained surface area of BAC was  $1950.9 \text{ m}^2\text{g}^{-1}$ , respective as calculated by the BET method. Meanwhile, the pore size distribution spectrum is shown in the inset of Figure S4, confirming the presence of hierarchical porosity with rich micropores and limited mesopores. The average pore diameter and total pore volume of BAC were about 2.88 nm and  $1.41 \text{ cm}^3 \text{ g}^{-1}$ , respectively. Such high surface area and porous nature of BAC could be expected to provide rapid electrolyte ion diffusion paths and surface reactions during electrochemical measurements.

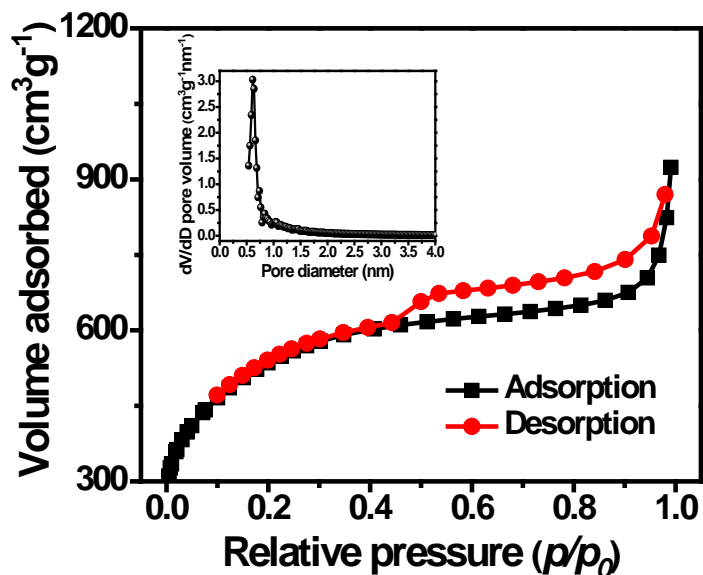

Figure S4.  $N_2$  adsorption/desorption isotherm and pore size distribution curves of the waste box derived activated porous carbon.

**Table S2.** Comparitive electrochemical performances of the yolk-shell structured Mn<sub>3</sub>O<sub>4</sub> NSs with previously reported manganese-based nanomaterials using the three-electrode system in aqueous electrolyte solution.

| Electrode material                                             | Current collector    | Synthesis method                | Electrolyte solution                  | Test condition         | Mass loading            | C <sub>sp</sub>              | Ref.      |
|----------------------------------------------------------------|----------------------|---------------------------------|---------------------------------------|------------------------|-------------------------|------------------------------|-----------|
| Mn <sub>3</sub> O <sub>4</sub> @rGO composites                 | Stainless steel mesh | Microwave hydrothermal method   | 1 M Na <sub>2</sub> SO <sub>4</sub>   | 5 mV s <sup>-1</sup>   | 3 mg/cm <sup>2</sup>    | 153 F g <sup>-1</sup>        | [S1]      |
| Graphene@Mn <sub>3</sub> O <sub>4</sub> composites             | Stainless steel foil | Solvothermal synthesis          | 1 M Na <sub>2</sub> SO <sub>4</sub>   | 0.1 A g <sup>-1</sup>  | --                      | 147 F g <sup>-1</sup>        | [S2]      |
| MnCO <sub>3</sub> nanospheres and nanocubes                    | Ni foam              | Co-precipitation method         | 0.1 M NaClO <sub>4</sub>              | 0.15 A g <sup>-1</sup> | --                      | 129 and 90 F g <sup>-1</sup> | [S3]      |
| Mn <sub>3</sub> O <sub>4</sub> nanoparticles embedded graphene | Pt foil              | Organosol-Ultrasonication       | 1 M Na <sub>2</sub> SO <sub>4</sub>   | 5 mV s <sup>-1</sup>   | 0.75 mg/cm <sup>2</sup> | 175 F g <sup>-1</sup>        | [S4]      |
| Cube-like Mn <sub>3</sub> O <sub>4</sub> @rGO                  | Stainless steel mesh | Chemical decomposition          | 1 M Na <sub>2</sub> SO <sub>4</sub>   | 0.5 A g <sup>-1</sup>  | --                      | 131 F g <sup>-1</sup>        | [S5]      |
| Mn <sub>3</sub> O <sub>4</sub> nanorods@graphene               | Ni foam              | Solvothermal                    | 1 M Na <sub>2</sub> SO <sub>4</sub>   | 1 A g <sup>-1</sup>    | 2 mg/cm <sup>2</sup>    | 115 F g <sup>-1</sup>        | [S6]      |
| Mn <sub>3</sub> O <sub>4</sub> nanowires                       | Graphite paper       | Hydrothermal method             | 1 M Na <sub>2</sub> SO <sub>4</sub>   | 500 mV s <sup>-1</sup> | 0.25 mg/cm <sup>2</sup> | 170 F g <sup>-1</sup>        | [S7]      |
| Porous MnO/Mn <sub>3</sub> O <sub>4</sub> composites           | Carbon disk          | Mn oleate decomposition         | 1 M Na <sub>2</sub> SO <sub>4</sub>   | 1 A g <sup>-1</sup>    | 0.15 mg/cm <sup>2</sup> | 207 F g <sup>-1</sup>        | [S8]      |
| Mn <sub>3</sub> O <sub>4</sub> @rGO composites                 | Graphite substrate   | Microwave-assisted hydrothermal | 0.5 M Na <sub>2</sub> SO <sub>4</sub> | 25 mV s <sup>-1</sup>  | 0.5 mg/cm <sup>2</sup>  | 193 F g <sup>-1</sup>        | [S9]      |
| Hollow Mn <sub>3</sub> O <sub>4</sub> structures               | Glassy carbon        | Hydrothermal method             | 2 M KCl                               | 5 mV s <sup>-1</sup>   | --                      | 148 F g <sup>-1</sup>        | [S10]     |
| Mn <sub>3</sub> O <sub>4</sub> nanosheets                      | Carbon fiber paper   | Electrodeposition               | 2 M KCl                               | 10 mV s <sup>-1</sup>  | 1.1 mg/cm <sup>2</sup>  | 145 F g <sup>-1</sup>        | [S11]     |
| Porous Mn <sub>3</sub> O <sub>4</sub> nanoplates               | Ni foam              | Hydrothermal method             | 1 M Na <sub>2</sub> SO <sub>4</sub>   | 0.5 A g <sup>-1</sup>  | --                      | 82 F g <sup>-1</sup>         | [S12]     |
| Yolk-shell structured Mn <sub>3</sub> O <sub>4</sub> NSs       | Carbon cloth         | Solvothermal hydrolysis         | 1 M Na <sub>2</sub> SO <sub>4</sub>   | 0.5 A g <sup>-1</sup>  | 1.6 mg/cm <sup>2</sup>  | 211.36 F g <sup>-1</sup>     | This work |

## References

- S1. L. Li, K. H. Seng, H. Liu, I. P. Nevirkovets and Z. Guo, *Electrochim. Acta*, 2013, 87, 801-808.
- S2. X. Zhang, X. Sun, Y. Chen, D. Zhang and Y. Ma, *Mater. Lett.*, 2012, 68, 336-339.
- S3. N. Zhang, J. Ma, Q. Li, J. Li and D. H. L. Ng, *RSC Adv.*, 2015, 5, 81981-81985.
- S4. B. Wang, J. Park, C. Wang, H. Ahn and G. Wang, *Electrochim. Acta*, 2010, 55, 6812-6817.
- S5. K. Subramani, D. Jeyakumar and M. Sathish, *Phys. Chem. Chem. Phys.*, 2014, 16, 4952-4961.
- S6. J. W. Lee, A. S. Hall, J.-D. Kim and T. E. Mallouk, *Chem. Mater.*, 2012, 24, 1158-1164.
- S7. C.-C. Hu, Y.-T. Wu and K.-H. Chang, *Chem. Mater.*, 2008, 20, 2890-2894.
- S8. J. Yang, X. Yang, Y. L. Zhong and J. Y. Ying, *Nano Energy*, 2015, 13, 702-708.
- S9. C.-L. Liu, K.-H. Chang, C.-C. Hu and W.-C. Wen, *J. Power Sources*, 2012, 217, 184-192.
- S10. M. Fang, X. Tan, M. Liu, S. Kang, X. Hu and L. Zhang, *CrystEngComm*, 2011, 13, 4915-4920.
- S11. K.-W. Nam, M. G. Kim and K.-B. Kim, *J. Phys. Chem. C*, 2007, 111, 749-758.
- S12. Z. Liu, Y. Xing, S. Fang, X. Qu, D. Wu, A. Zhang and B. Xu, *RSC Adv.*, 2015, 5, 54867-54872.
